# Supplementary material for: Astragalus Complanatus Ethanol Attenuates Septic Shock by Exerting Anti-Inflammatory Effects on Macrophages
Source: MDPI journal article supplement (doi:10.3390/ijms25010384), 2023-12-27
Supplement: s1 [file s1]

Table S1. Primer list for RT-PCR.

| Gene Name                      | (5') Forward Primers (3') | (5') Reverse Primers (3') |
|--------------------------------|---------------------------|---------------------------|
| <b>iNOS</b>                    | CAAGCACCTTGGAAGAGGAG      | AAGGCCAAACACAGCATACC      |
| <b>COX2</b>                    | GCTGTACAAGCAGTGGCAAA      | TTCTGCAGCCATTTCCTTCT      |
| <b>TNF-<math>\alpha</math></b> | ACGGCATGGATCTCAAAGAC      | TGAGATAGCAAATCGGCTGAC     |
| <b>IL-1<math>\beta</math></b>  | GAGTGTGGATCCCAAGCAAT      | CTTGTGCTCTGCTTGTGAGG      |
| <b>IL-6</b>                    | CTGATGCTGGTGACAACCAC      | TCCACGATTTCCCAGAGAAC      |
| <b>GAPDH</b>                   | ACCCAGAAGACTGTGGATGG      | ACACATTG GGGGTAGGAACA     |
